# Supplementary material for: Repair of unilateral combined orbital floor and medial wall fracture using two titanium mesh plates: a modified technique
Source: PubMed Central journal article supplement — Ann Transl Med. 2021 Mar;9(6):463. doi: 10.21037/atm-21-598 (PMC8039696; doi:10.21037/atm-21-598), 2021-03
Supplement: atm-09-06-463-dss.pdf [file atm-09-06-463-dss.pdf]

## Data Sharing Statement

|                     |                                                                                                                                                     |                                                                                                                  |
|---------------------|-----------------------------------------------------------------------------------------------------------------------------------------------------|------------------------------------------------------------------------------------------------------------------|
| <b>Article Info</b> | http://dx.doi.org/10.21037/atm-21-598                                                                                                               |                                                                                                                  |
| <b>Item</b>         | <b>Question</b>                                                                                                                                     | <b>Authors' Response</b><br>(place "-" if not applicable)                                                        |
| 1                   | Would you like to share data collected for your study to others?                                                                                    | Yes.                                                                                                             |
| 2                   | If not, would you like to share the reason for your decision?                                                                                       | -                                                                                                                |
| 3                   | What data in particular will be shared?                                                                                                             | The therapeutic outcomes data in particular will be shared.                                                      |
| 4                   | Any other documents will be shared? Such as study protocol, statistical analysis plan, informed consent form, clinical study report, analytic code. | Informed consent form, and clinical study report will also be shared if requested.                               |
| 5                   | When will data availability begin?                                                                                                                  | From the publication date.                                                                                       |
| 6                   | When will data availability end?                                                                                                                    | 1 year within the publication date.                                                                              |
| 7                   | To whom will you share the data?                                                                                                                    | Orbital surgeons who are interested in this study.                                                               |
| 8                   | For what type of analysis or purpose?                                                                                                               | For analysis to evaluate the safety and efficiency of this technique describe in this study.                     |
| 9                   | How or where can the data/documents be obtained?                                                                                                    | Emails could be sent to the address below to obtain the shared data: yujg1976@163.com.                           |
| 10                  | Any other restrictions?                                                                                                                             | We may balance the potential benefits and risks for each request and then provide the data that could be shared. |
